# Supplementary material for: Rifampicin and clarithromycin (extended release) versus rifampicin and streptomycin for limited Buruli ulcer lesions: a randomised, open-label, non-inferiority phase 3 trial
Source: PubMed Central journal article supplement — Lancet. 2020 Apr 18;395(10232):1259–67. doi: 10.1016/S0140-6736(20)30047-7 (PMC7181188; doi:10.1016/s0140-6736(20)30047-7), 2020-04-18
Supplement: mmc1.pdf [file mmc1.pdf]

# THE LANCET

## Supplementary appendix

This appendix formed part of the original submission and has been peer reviewed.  
We post it as supplied by the authors.

Supplement to: Phillips RO, Robert J, Abass KM, et al. Rifampicin and clarithromycin (extended release) versus rifampicin and streptomycin for limited Buruli ulcer lesions: a randomised, open-label, non-inferiority phase 3 trial. *Lancet* 2020; published online March 12. [http://dx.doi.org/10.1016/S0140-6736\(20\)30047-7](http://dx.doi.org/10.1016/S0140-6736(20)30047-7).

**Table S1- CONSORT Checklist:**

| <b>Title and abstract</b> |    |                                                                                                                                       |    |
|---------------------------|----|---------------------------------------------------------------------------------------------------------------------------------------|----|
|                           | 1a | Identification as a randomised trial in the title                                                                                     | √  |
|                           | 1b | Structured summary of trial design, methods, results, and conclusions                                                                 | √  |
| <b>Introduction</b>       |    |                                                                                                                                       |    |
| Background and objectives | 2a | Scientific background and explanation of rationale                                                                                    | √  |
|                           | 2b | Specific objectives or hypotheses                                                                                                     | √  |
| <b>Methods</b>            |    |                                                                                                                                       |    |
| Trial design              | 3a | Description of trial design (such as parallel, factorial) including allocation ratio                                                  | √  |
|                           | 3b | Important changes to methods after trial commencement (such as eligibility criteria), with reasons                                    | na |
| Participants              | 4a | Eligibility criteria for participants                                                                                                 | √  |
|                           | 4b | Settings and locations where the data were collected                                                                                  | √  |
| Interventions             | 5  | The interventions for each group with sufficient details to allow replication, including how and when they were actually administered | √  |
| Outcomes                  | 6a | Completely defined pre-specified primary and secondary outcome measures, including how and when they were assessed                    | √  |
|                           | 6b | Any changes to trial outcomes after the trial commenced, with reasons                                                                 | na |

|                                                      |     |                                                                                                                                                |      |
|------------------------------------------------------|-----|------------------------------------------------------------------------------------------------------------------------------------------------|------|
| Sample size                                          | 7a  | How sample size was determined                                                                                                                 | √    |
|                                                      | 7b  | When applicable, explanation of any interim analyses and stopping guidelines                                                                   | √    |
| <b>Randomisation:</b>                                |     |                                                                                                                                                |      |
| Sequence generation                                  | 8a  | Method used to generate the random allocation sequence                                                                                         | √    |
|                                                      | 8b  | Type of randomisation; details of any restriction (such as blocking and block size)                                                            | √    |
| Allocation concealment mechanism                     | 9   | Mechanism used to implement the random allocation sequence (such as sequentially numbered containers), (no concealment - open label)           | √    |
| Implementation                                       | 10  | Who generated the random allocation sequence, who enrolled participants, and who assigned participants to interventions                        | √    |
| Blinding                                             | 11a | If done, who was blinded after assignment to interventions (for example, participants, care providers, those assessing outcomes) and how       | n.a. |
|                                                      | 11b | If relevant, description of the similarity of interventions                                                                                    | √    |
| Statistical methods                                  | 12a | Statistical methods used to compare groups for primary and secondary outcomes                                                                  | √    |
|                                                      | 12b | Methods for additional analyses, such as subgroup analyses and adjusted analyses                                                               | n.a. |
| <b>Results</b>                                       |     |                                                                                                                                                |      |
| Participant flow (a diagram is strongly recommended) | 13a | For each group, the numbers of participants who were randomly assigned, received intended treatment, and were analysed for the primary outcome | √    |
|                                                      | 13b | For each group, losses and exclusions after randomisation, together with reasons                                                               | √    |

|                         |     |                                                                                                                                                   |      |
|-------------------------|-----|---------------------------------------------------------------------------------------------------------------------------------------------------|------|
| Recruitment             | 14a | Dates defining the periods of recruitment and follow-up                                                                                           | √    |
|                         | 14b | Why the trial ended or was stopped                                                                                                                | √    |
| Baseline data           | 15  | A table showing baseline demographic and clinical characteristics for each group                                                                  | √    |
| Numbers analysed        | 16  | For each group, number of participants (denominator) included in each analysis and whether the analysis was by original assigned groups           | √    |
| Outcomes and estimation | 17a | For each primary and secondary outcome, results for each group, and the estimated effect size and its precision (such as 95% confidence interval) | √    |
|                         | 17b | For binary outcomes, presentation of both absolute and relative effect sizes is recommended                                                       | √    |
| Ancillary analyses      | 18  | Results of any other analyses performed, including subgroup analyses and adjusted analyses, distinguishing pre-specified from exploratory         | n.a. |
| Harms                   | 19  | All important harms or unintended effects in each group (for specific guidance see CONSORT for harms)                                             | √    |
| <b>Discussion</b>       |     |                                                                                                                                                   |      |
| Limitations             | 20  | Trial limitations, addressing sources of potential bias, imprecision, and, if relevant, multiplicity of analyses                                  | √    |
| Generalisability        | 21  | Generalisability (external validity, applicability) of the trial findings                                                                         | √    |
| Interpretation          | 22  | Interpretation consistent with results, balancing benefits and harms, and considering other relevant evidence                                     | √    |

| <b>Other information</b> |    |                                                                                 |   |
|--------------------------|----|---------------------------------------------------------------------------------|---|
| Registration             | 23 | Registration number and name of trial registry                                  | √ |
| Protocol                 | 24 | Where the full trial protocol can be accessed, if available                     | √ |
| Funding                  | 25 | Sources of funding and other support (such as supply of drugs), role of funders | √ |

**Table S2: Dosing schedule, Streptomycin, Rifampicin and Clarithromycin ER**

| <b>Dose of Streptomycin (S), Rifampicin (R) and Clarithromycin (C) according to patient body weight</b> |                                                   |                                                           |                      |                                                                                  |
|---------------------------------------------------------------------------------------------------------|---------------------------------------------------|-----------------------------------------------------------|----------------------|----------------------------------------------------------------------------------|
| <b>Body weight of patient (kg)</b>                                                                      | <b>Streptomycin (1 g) once daily<br/>Dose (g)</b> | <b>Rifampicin (300mg/tablet) once daily<br/>Dose (mg)</b> | <b>No of tablets</b> | <b>Clarithromycin (extended release once daily tablets 500 mg)<br/>Dose (mg)</b> |
| <b>21-39</b>                                                                                            | 0.50                                              | 300                                                       | 1.00                 | 500 (1 tablet)                                                                   |
| <b>40-54</b>                                                                                            | 0.75                                              | 450                                                       | 1.50                 | 500 (1 tablet)                                                                   |
| <b>&gt;54</b>                                                                                           | 1.00                                              | 600                                                       | 2.00                 | 1,000 (1 tablet)                                                                 |

**Table S3 - Paradoxical response (PR) – 4 definitions based on ARANZ measurements**

|                                                  | RS8 |      | RC8 |      | Total |      | p-value |
|--------------------------------------------------|-----|------|-----|------|-------|------|---------|
|                                                  | n   | %    | n   | %    | n     | %    |         |
| Any increase relative to previous measurement    | 95  | 62,9 | 82  | 56,2 | 177   | 59,6 | 0,236   |
| Any increase after initial decrease              | 79  | 52,3 | 62  | 42,5 | 141   | 47,5 | 0,089   |
| Increase of $\geq 20\%$ after initial decrease   | 65  | 43,0 | 49  | 33,6 | 114   | 38,4 | 0,093   |
| Two consecutive increases after initial decrease | 22  | 14,6 | 23  | 15,8 | 45    | 15,2 | 0,776   |

**Table S4 - healing time by lesion size - Category I: <5 cm; Category II: 5-10 cm cross sectional diameter**

|                                       | RS8        |             |             | RC8         |              |             |
|---------------------------------------|------------|-------------|-------------|-------------|--------------|-------------|
|                                       | Cat I      | Cat II      | Total       | Cat I       | Cat II       | Total       |
| Number of Subjects                    | 92         | 59          | 151         | 92          | 54           | 146         |
| Time at Risk in person weeks          | 1586       | 1664        | 3250        | 1547        | 1286         | 2833        |
| Incidence Rate (per 100 person weeks) | 5,7        | 3,2         | 4,4         | 5,7         | 4,0          | 4,9         |
| Median (IQR) healing time in weeks    | 16 (6 -28) | 28 (16 -38) | 24 (8 - 32) | 13 (6 - 24) | 20 (12 - 32) | 16 (8 - 25) |
| P-value                               | <0.001     |             |             | 0,031       |              |             |

**Table S5 - healing time by lesion type: ulcer versus Nodule/Plaque/Oedema (N/P/O)**

|                                       | RS8        |             |             | RC8         |             |             |
|---------------------------------------|------------|-------------|-------------|-------------|-------------|-------------|
|                                       | ulcer      | N/P/O       | Total       | ulcer       | N/P/O       | Total       |
| Number of Subjects                    | 83         | 68          | 151         | 73          | 73          | 146         |
| Time at Risk in person weeks          | 1707       | 1543        | 3250        | 1340        | 1493        | 2833        |
| Incidence Rate (per 100 person weeks) | 4,7        | 4,1         | 4,4         | 5,2         | 4,7         | 4,9         |
| Median (IQR) healing time in weeks    | 20 (8 -28) | 24 (6 - 35) | 24 (8 - 32) | 12 (8 - 24) | 20 (8 - 25) | 16 (8 - 25) |
| P-value                               | 0,310      |             |             | 0,597       |             |             |

**Figure S1: time to healing, for lesion size (category I versus category II) and treatment allocation (RS8 versus RC8)**

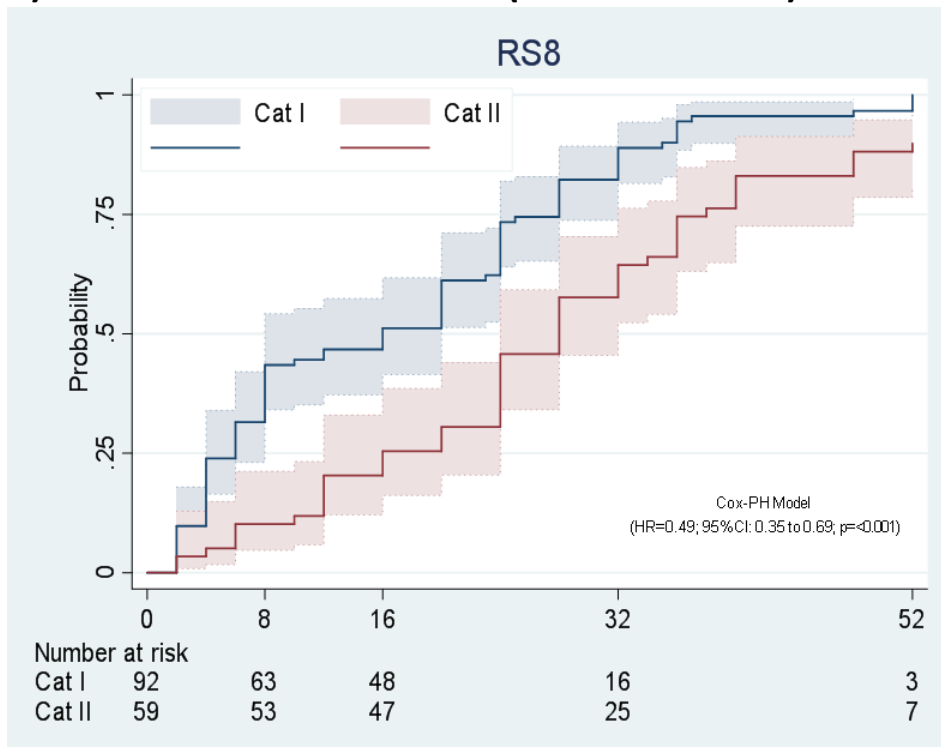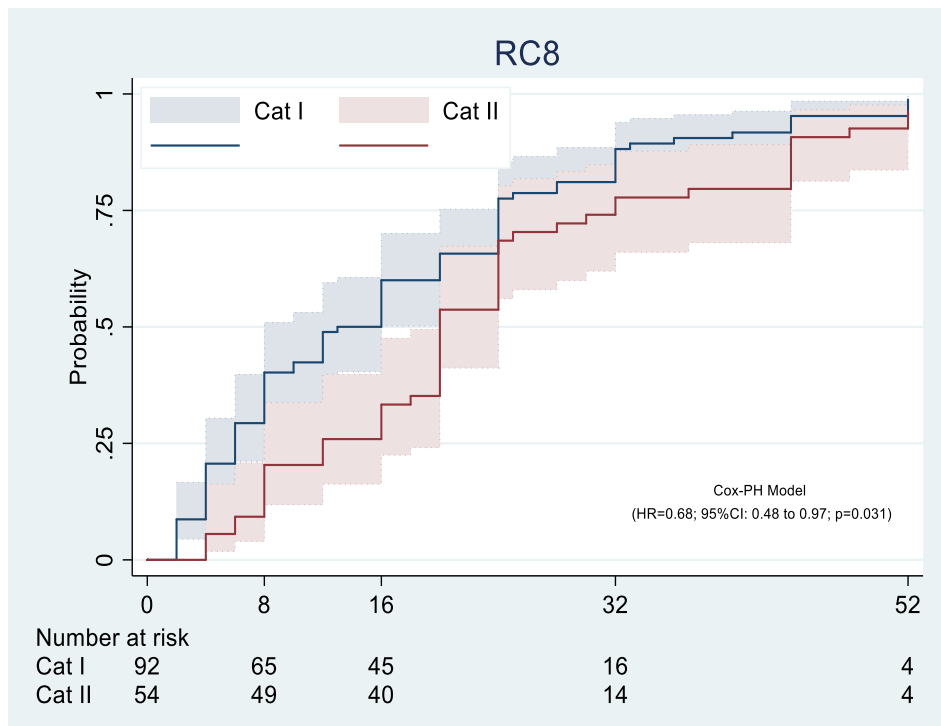

**Figure S2: time to healing for ulcerated versus non-ulcerated lesions: Nodule/Plaque/Oedema; in RC8, and in RS8 arms.**

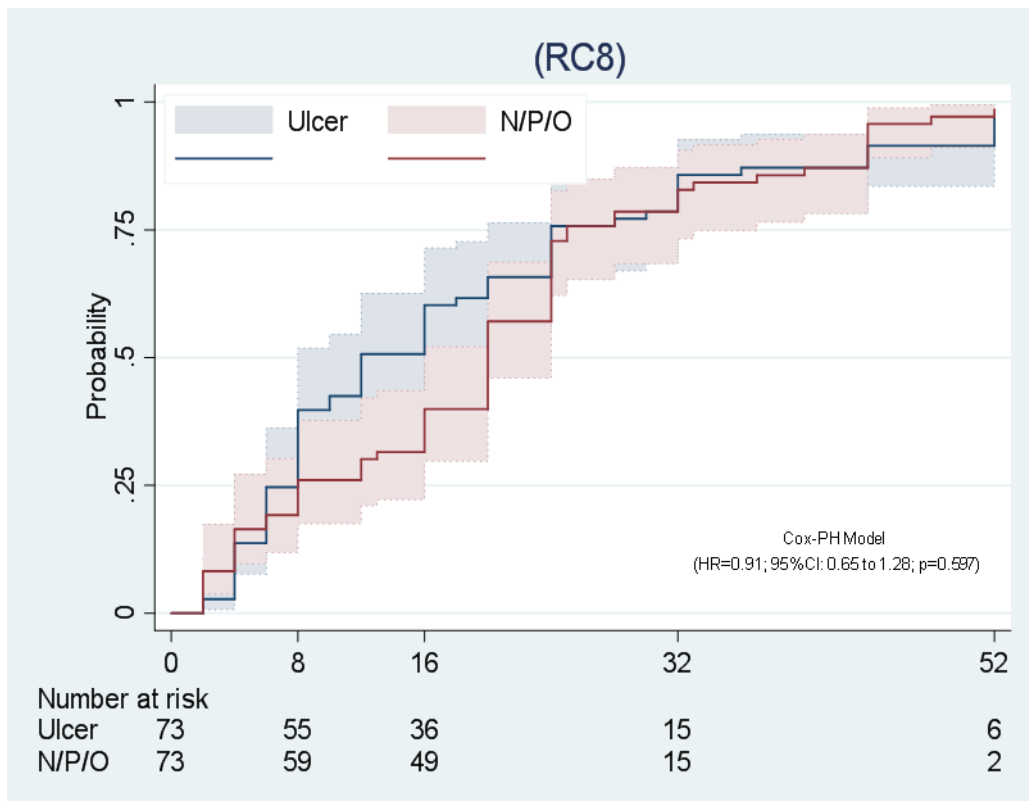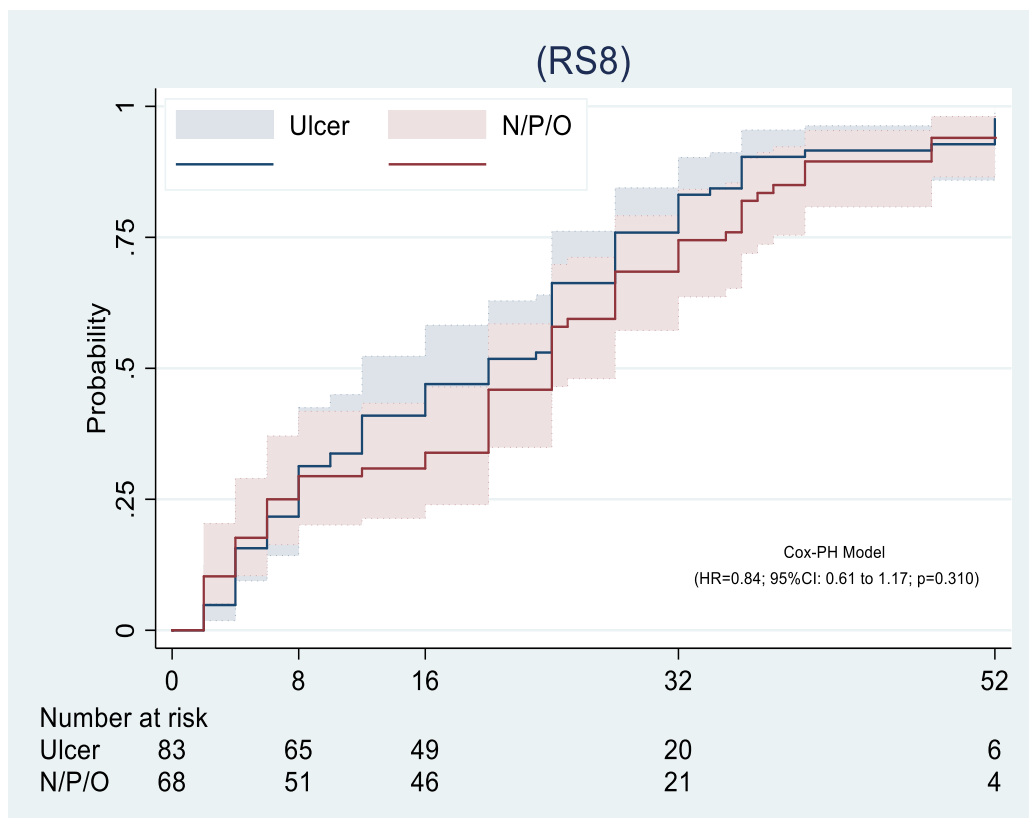



**Table S5:** details of study participants with unsuccessful outcome

| TREATMENT ARM | AGE | SEX    | LESION TYPE | LESION CATEGORY | COMMENT                                                                                                                                                  |
|---------------|-----|--------|-------------|-----------------|----------------------------------------------------------------------------------------------------------------------------------------------------------|
| RS8           | 72  | Male   | Ulcer       | II              | Lesion not healed due to trauma which caused enlargement, possibly due to the location of lesion (lateral malleolus)                                     |
| RC8           | 26  | Female | Ulcer       | I               | Patient was lost to follow up at week 12 when lesion was unhealed. Could not be traced to establish healing                                              |
| RS8           | 9   | Female | Ulcer       | II              | Lesion healed at week 56                                                                                                                                 |
| RS8           | 9   | Male   | Ulcer       | II              | Lesion healed at week 77                                                                                                                                 |
| RC8           | 11  | Female | Ulcer       | II              | Patient was lost to follow up, reported at week 97 but not healed possibly due to improper wound management                                              |
| RC8           | 32  | Male   | Plaque      | II              | Suspected malignancy. Patient was lost to follow up when referred for further medical checks                                                             |
| RS8           | 23  | Female | Ulcer       | II              | Patient developed paradoxical reaction, suspected daily trauma due to location of lesion (medial malleolus) and lack of proper wound care                |
| RS8           | 7   | Male   | Plaque      | I               | Patient lost to follow up after week 12. Unable to establish healing at week 52                                                                          |
| RC8           | 7   | Female | Oedema      | II              | Lesion not healed due to unresolved osteomyelitis                                                                                                        |
| RS8           | 75  | Female | Ulcer       | II              | Patient was lost to follow up, traced after week 52 but not healed                                                                                       |
| RS8           | 14  | Male   | Ulcer       | II              | Lesion not healed after 52 weeks - participant took to traditional treatment being reluctant to accept per-protocol wound care offered                   |
| RC8           | 84  | Female |             | II              | Patient could not be traced after baseline. No documentation to support healing although lesion said to heal at week 20                                  |
| RC8           | 45  | Female | Ulcer       | I               | Patient was lost to follow up after week 20. Patient reported lesion not healed when called by phone after week 52 - possibly due to improper wound care |

**Table S6:** accrual of study participants at study sites over time

| Year \ Site   | 2013      | 2014       | 2015      | 2016      | Total      | %    |
|---------------|-----------|------------|-----------|-----------|------------|------|
| Agogo, Ghana  | 41        | 51         | 33        | 16        | 141        | 45.7 |
| Tepa, Ghana   | 13        | 11         | 21        | 17        | 62         | 20.3 |
| Dunkwa, Ghana | 4         | 11         | 9         | 6         | 30         | 9.5  |
| Nkawie, Ghana | 5         | 7          | 5         | 4         | 21         | 6.8  |
| Pobè, Benin   | 8         | 22         | 8         | 18        | 56         | 17.7 |
| <b>Total</b>  | <b>71</b> | <b>102</b> | <b>76</b> | <b>61</b> | <b>310</b> | 100  |
